# Supplementary material for: Prognostic Value of Epstein-Barr Virus Infection in Patients with Gastric Cancer: A Meta-Analysis
Source: Research Square preprint supplement (doi:10.21203/rs.3.rs-1398104/v1), 2022-03-11
Supplement: Supplementary file 1 [file 21bc56668bcc6847ea9003b2.xlsx]

## Sheet: Sheet1
Table 1. Characteristics of included studies in the meta-analysis
Author	Year	Country	Region	NOS score	No. of patients	Statistical analysis
J. G. Aversa	2021	China	Asia	7	1035	Multivariate
S. Bang	2020	Korea	Asia	7	539	Univariate
E. M. Birkman	2018	Finland	Europe	8	238	Univariate
S. J. Byeon	2018	Korea	Asia	6	8819	Multivariate
L. Cai	2020	China	Asia	7	271	Univariate
M. S. Chang	2001	Korea	Asia	8	302	Univariate
C. J. Cho	2018	Korea	Asia	8	58	Univariate
S. Corallo	2020	Italy	Europe	8	175	Multivariate
A. Corvalán	2005	Chile	Americas	6	93	Univariate
S. de Rosa	2018	Italy	Europe	8	169	Multivariate
M. Dong	2016	China	Asia	7	855	Univariate
W. L. Fang	2020	Taiwan	Asia	8	460	Univariate
E. Gasenko	2019	Latvia	Americas	8	302	Multivariate
K. L. Grogg	2003	United States	Americas	7	110	Univariate
Y. He	2002	China	Asia	6	219	Univariate
L. C. Hewitt	2018	Netherlands	Europe	8	1178	Univariate
S. C. Huang	2014	Taiwan	Asia	8	994	Univariate
J. Koh	2017	Korea	Asia	6	392	Univariate
C. Koriyama	2007	Japan	Asia	8	179	Univariate
M. J. Kwon	2017	Korea	Asia	6	394	Multivariate
Z. Li	2016	China	Asia	6	137	Univariate
J. Ma	2017	China	Asia	9	571	Univariate
B. H. Min	2016	Korea	Asia	7	145	Multivariate
C. Nogueira	2017	Portugal	Europe	6	82	Univariate
E. S. Park	2009	Korea	Asia	8	457	Multivariate
M. A. Pereira	2018	Brazil	Americas	7	287	Univariate
M. Z. Qiu	2020	China	Asia	7	2760	Multivariate
J. Ribeiro	2017	Portugal	Europe	7	179	Univariate
N. Setia	2016	America	Europe	7	146	Univariate
Y. Sukawa	2012	Japan	Asia	6	231	Univariate
C. Y. Tsai	2017	Taiwan	Asia	8	1039	Univariate
F. Wang	2019	China	Asia	7	540	Multivariate
Y. Yang	2019	China	Asia	7	3241	Multivariate
S. Yun	2021	Korea	Asia	5	389	Univariate
Y. W. Zhang	2019	China	Asia	9	298	Univariate
NOS = Newcastle-Ottawa Scale, EBER = EBV-encoded small RNAs, No. = number.
